# Supplementary material for: Decentralized Algorithms for Weapon‐Target Assignment in Swarming Combat System
Source: Hindawi journal article supplement (doi:10.1155/2019/8425403), 2019-01-01
Supplement: f1 [file 8425403.f1.zip]

Archive with 20 entries (17 files):
- 1 auction algorithm/
- 1 auction algorithm/AB1.m
- 1 auction algorithm/AB2.m
- 1 auction algorithm/mainfunction.m
- 1 auction algorithm/robot.m
- 1 auction algorithm/robot1.m
- 1 auction algorithm/~$实验记录表.xlsx
- 2 task swap algorithm/
- 2 task swap algorithm/BFS.m
- 2 task swap algorithm/mainfunction.m
- 2 task swap algorithm/mymethod.m
- 2 task swap algorithm/relaxation.m
- 2 task swap algorithm/robot1.m
- 2 task swap algorithm/robot6.m
- 3 hybrid algorithm/
- 3 hybrid algorithm/AB1.m
- 3 hybrid algorithm/mainfunction.m
- 3 hybrid algorithm/mymethod.m
- 3 hybrid algorithm/robot.m
- 3 hybrid algorithm/robot6.m
