# Supplementary material for: Decentralized Algorithms for Weapon‐Target Assignment in Swarming Combat System
Source: Hindawi journal article supplement (doi:10.1155/2019/8425403), 2019-01-01
Supplement: f1 [file 8425403.f1.zip › 1 auction algorithm/AB1.m]

%%%AB1
function [assign,fx,sum,runtime]=AB1(Aij0,neighbor) 
iteration_count=0;  

[M,N]=size(Aij0);

P0=zeros(M,N); 
P1=P0;
P_temp=zeros(M,N);

W_T_ID0=ones(M,M);
W_T_SUR0=ones(M,M);
W_T_ID1=ones(M,M);
W_T_SUR1=ones(M,M);
W_ALLT_SUR0=N*ones(M,M);
W_ALLT_SUR1=N*ones(M,M);

Jt0=ones(1,M);   
Jt1=ones(1,M);  

derminate_con=1000; 

fx=[];
sum=[];
assign=[];
runtime=[];
tl1=1e-4;
tl2=0.02*M/120;

while iteration_count<derminate_con  
    iteration_count=iteration_count+1;
    t1=clock;
    for i=1:M
       [P1(i,:),Jt1(i),W_T_ID1(i,:),W_T_SUR1(i,:),W_ALLT_SUR1(i,:)]=robot(P0,W_T_ID0,W_T_SUR0,W_ALLT_SUR0,Jt0(i),Aij0(i,:),i,neighbor);
       Jt0(i)=Jt1(i);  
    end
    t2=clock;
    time_temp=etime(t2,t1);
    if time_temp<tl1
        time_temp=tl2;
    end
    
    runtime=[runtime,time_temp];
    
    P0=P1;
    W_T_ID0=W_T_ID1;
    W_T_SUR0=W_T_SUR1;
    W_ALLT_SUR0=W_ALLT_SUR1;
    if all((P_temp-P0)==0)
        break;
    end
    P_temp=P0;
    sum_temp=0;
    T_sur=ones(1,N);  
    for i=1:M
        sum_temp=sum_temp+Aij0(i,Jt1(i));
        T_sur(Jt0(i))=T_sur(Jt0(i))*(1-Aij0(i,Jt0(i)));
    end
    T_kill=1-T_sur;
    P_kill=0;
    for i=1:N
        P_kill=P_kill+T_kill(i);
    end
    fx=[fx,P_kill];
    sum=[sum,sum_temp];
    assign=[assign; Jt1];   
end
end
