# Supplementary material for: Decentralized Algorithms for Weapon‐Target Assignment in Swarming Combat System
Source: Hindawi journal article supplement (doi:10.1155/2019/8425403), 2019-01-01
Supplement: f1 [file 8425403.f1.zip › 1 auction algorithm/robot1.m]

%%%this function is embedded in AB2
function [P1,J1,P_R_ID]=robot1(P,P_R_ID_ago,a1j,Jt_1,N,ID,~)

P_ago=P(ID,Jt_1);  
for j=1:N
    [P(ID,j),P_max_ID]=max(P(:,j));
    if P_R_ID_ago(P_max_ID,j)
         P_R_ID_ago(ID,j)=P_R_ID_ago(P_max_ID,j);  
    end    
end

if (P_ago<=P(ID,Jt_1)) && (ID~=P_R_ID_ago(ID,Jt_1))
    vij=a1j-P(ID,:);
    [~,ID_descend]=sort(vij,2,'descend');  
    J1=ID_descend(1);  
    jk_next=ID_descend(2);  
    kesi=a1j(J1);
    p1_jk=P(ID,J1)+0.5*(vij(J1)-vij(jk_next))+0.5*kesi;
    P1=P(ID,:);
    P1(J1)=p1_jk;
    P_R_ID=P_R_ID_ago(ID,:);
    P_R_ID(J1)=ID;  
else
    J1=Jt_1;
    P1=P(ID,:);
    P_R_ID=P_R_ID_ago(ID,:);
end
end
