# Supplementary material for: Decentralized Algorithms for Weapon‐Target Assignment in Swarming Combat System
Source: Hindawi journal article supplement (doi:10.1155/2019/8425403), 2019-01-01
Supplement: f1 [file 8425403.f1.zip › 2 task swap algorithm/BFS.m]

%±¾³ÌÐòÄÚÈÝÊÇËã·¨3.1£¬½áºÏÀ×´ï¶Ô¿¹³¡¾°
%»úÆ÷ÈËºÍÈÎÎñ¸öÊýN
function [count_BFS,ri_tj1,flag,sum_cost_primal,sum_cost_after,P_kill_BFS1]=BFS(J_amount,N_extension,cij,ri_tj,ri_tj_primal,P_kill_BFS0)
M=J_amount;
N=N_extension;
flag=0;
%Ëæ»ú·ÖÅä³õÊ¼·½°¸,ri_tj
% ri_tj=1:M;
%%%%±àÐ´³ÌÐòÓÉri_tjÍË³ötj_ri
tj_ri=zeros(1,N);
for i=1:M
    tj_temp=ri_tj(i);
    tj_ri(tj_temp)=i;
end

%³õÊ¼»¯ui,vj,ºÍreduced cost cij_r.
ui=zeros(1,M);
vj=zeros(1,N);
cij_r=zeros(M,N);
%¼ÆËã³õÊ¼·ÖÅäµÄ×ÜcostÖµ
sum_cost_primal=0;
for i=1:M
    ui(i)=cij(i,ri_tj(i));
    cij_r(i,:)=cij(i,:)-ui(i)-vj;
    sum_cost_primal=sum_cost_primal+cij(tj_ri(i),i);    %Î´swap loopÖ®Ç°µÄºÄÄÜcost
end
%%%³õÊ¼»¯±äÁ¿
%¸ù½Úµã
%¸ù½Úµã  
mincij_r=min(min(cij_r));
[r0,t0]=find(cij_r==mincij_r);  %r0,t0Îª¾ØÕóÖÐÐÇ×´±ê¼ÇµÄÔªËØ

r0=r0(1);
t0=t0(1);
set_r=zeros(1,M);  set_t=zeros(1,N);  %´æ·ÅÀ©Õ¹Ê÷ÖÐµÄ½Úµã£¬sr(i)=0±íÊ¾ÉÐÎ´±»À©Õ¹
set_t(t0)=1;% color  st
%spanning treeÖÐ¼ÇÂ¼¸¸½Úµã£¬¾ØÕóÖÐÓÉÎ´·ÖÅäÔªËØÖ¸ÏòÒÑ·ÖÅäÔªËØ
r_pre=zeros(1,M);
%À©Õ¹ËÑË÷Ê÷
Q=tj_ri(t0);
set_r(Q)=1; % color  sr
r_pre(Q)=r0;
%¿ÉÐÐ½âµÄswap loopÂ·¾¶
Path=[];
%dual adjustment ÖÐÓÃµ½µÄ±äÁ¿
cij_r_temp=Inf*ones(1,N);
minh=Inf*ones(M,1);
flag1=0;
flag2=0;
if cij_r(r0,t0)>=1e-8
    flag2=1;
end
%µü´ú´ÎÊýiteration=1000
iteration=1000;
count_BFS=0;
while ~isempty(Q)&&iteration>0
    iteration=iteration-1;
    if flag2==1
        flag=1;
%         disp('the solution cannot be improved more')
        break;
    end
    current_r=Q;
    Q=[];  
    %ËÑÑ°current_rÏÂÓÐÃ»ÓÐcij_r(current_r)=0µÄÇé¿ö
    [~,remain_t]=find(set_t==0);   %ÕÒµ½Ã»ÓÐÀ©Õ¹¹ýµÄ¶ÓÁÐ
    for i=1:length(current_r)
       Q_t=find(abs(cij_r(current_r(i),remain_t))<1e-10);  %´íÎó£¬Èôcurrent_rÓÐ¶à¸öÖµÊ±
       if ~isempty(Q_t)
           Q_t=remain_t(Q_t);
           Q1=tj_ri(Q_t);
           r_pre(Q1)=current_r(i);
           Q=[Q,Q1];  %¸üÐÂQ
           set_r(Q)=1;   set_t(Q_t)=1;   %ÈÝÒ×³öÏÖ´íÎó£¬¼°Ê±±ê¼ÇQµÄset_rºÍset_tÎª1
       end
    end
    if isempty(Q)   %dual adjustment
        %¸üÐÂQÒÔ¼°ui,vj,cij_r
        for i=1:M
            if set_r(i)
                %Ñ°ÕÒmin cij_r(i)>0
%                 Q_t=find(cij_r(i,remain_t)>=0);  %Q_t±»µ±×÷ÁÙÊ±±äÁ¿,×¢ÒâÓÐInfµÄÖµ
%Note that we have made some changes here!
                Q_t=find(cij_r(i,remain_t)>0); 
                if ~isempty(Q_t)
                    Q_t=remain_t(Q_t);
                    cij_r_temp(Q_t)=cij_r(i,Q_t);
                    minh(i)=min(cij_r_temp);
                    flag1=1;
                end
                cij_r_temp=Inf*ones(1,N);
            end            
        end      
        if flag1
            flag1=0;
            [min_d,Q]=min(minh);  %ÕÒµ½ÁËQ£¬Ò²ÕÒµ½ÁËmin_d
            if min_d~=Inf             
                %¸üÐÂui,vj,cij_r 
                ri=find(set_r);
                tj=find(set_t);
                ui(ri)=ui(ri)+min_d;
                vj(tj)=vj(tj)-min_d;
                ui1=ui';
                UI=ui1(:,ones(1,N));
                VJ=vj(ones(M,1),:);
                cij_r=cij-UI-VJ; %%%ÓÐ´íÎó           
                minh=Inf*ones(M,1);
            else
                flag2=1;
            end
        end   
    else
        %´æÔÚcij_r=0µÄÇé¿ö£¬¸üÐÂset_r,set_t
        set_r(Q)=1;   set_t(Q_t)=1;
        %¼ì²âswap loopÊÇ·ñÐÎ³É
        if ismember(r0,Q)
            if cij_r(r0,t0)<0  %swap loop is feasible
                %ÐÎ³ÉPath£¬²¢break
                ri_tj_temp=ri_tj;
                tj_ri_temp=tj_ri;
                temp1=r0; 
                temp2=r_pre(r0); 
                temp3=ri_tj_temp(temp1);
                Path=r0;
                while temp2~=r0                   
                    Path=[Path,temp2]; 
                    temp4=ri_tj_temp(temp2);  
                    ri_tj_temp(temp2)=temp3;  
                    tj_ri_temp(temp3)=temp2;                 
                    temp1=temp2;
                    temp2=r_pre(temp1);
                    temp3=temp4;
                end
                ri_tj_temp(temp2)=temp3;
                tj_ri_temp(temp3)=temp2; 
                %Calculate the value of the new assignment
                T_sur_temp=ones(1,N);
                for j=1:M
                    T_sur_temp(ri_tj_primal(ri_tj_temp(j)))=T_sur_temp(ri_tj_primal(ri_tj_temp(j)))*cij(j,ri_tj_temp(j));
                end 
                P_kill_update=0;
                for j=1:N
                    P_kill_update=P_kill_update+1-T_sur_temp(j);       
                end
                %check whether the new assignment improves the objective
                %function
                if P_kill_update>P_kill_BFS0
                    ri_tj=ri_tj_temp;
                    tj_ri=tj_ri_temp;
                    P_kill_BFS0=P_kill_update;
                    break;
                else
                    set_r(r0)=0; set_t(ri_tj(r0))=0;
                    Q_temp=[];
                    for i=1:length(Q)
                        if Q(i)~=r0
                            Q_temp=[Q_temp,Q(i)];
                        end
                    end
                    Q=Q_temp;
                    if isempty(Q)   %dual adjustment
                        
                        %¸üÐÂQÒÔ¼°ui,vj,cij_r
                        for i=1:M
                            if set_r(i)
                                %Ñ°ÕÒmin cij_r(i)>0
                %                 Q_t=find(cij_r(i,remain_t)>=0);  %Q_t±»µ±×÷ÁÙÊ±±äÁ¿,×¢ÒâÓÐInfµÄÖµ
                %Note that we have made some changes here!
                                Q_t=find(cij_r(i,remain_t)>0); 
                                if ~isempty(Q_t)
                                    Q_t=remain_t(Q_t);
                                    cij_r_temp(Q_t)=cij_r(i,Q_t);
                                    minh(i)=min(cij_r_temp);
                                    flag1=1;
                                end
                                cij_r_temp=Inf*ones(1,N);
                            end            
                        end      
                        if flag1
                            flag1=0;
                            [min_d,Q]=min(minh);  %ÕÒµ½ÁËQ£¬Ò²ÕÒµ½ÁËmin_d
                            if min_d~=Inf             
                                %¸üÐÂui,vj,cij_r 
                                ri=find(set_r);
                                tj=find(set_t);
                                ui(ri)=ui(ri)+min_d;
                                vj(tj)=vj(tj)-min_d;
                                ui1=ui';
                                UI=ui1(:,ones(1,N));
                                VJ=vj(ones(M,1),:);
                                cij_r=cij-UI-VJ; %%%ÓÐ´íÎó           
                                minh=Inf*ones(M,1);
                            else
                                flag2=1;
                            end
                        end
                    end
                end  
            end           
        end      
    end 
    %Èç¹û¸ù½Úµãcij_r(r0,t0)>=0£¬ÖØÐÂÑ¡È¡¸ù½Úµã£¬¸³³õÖµ¡£
    if cij_r(r0,t0)>=1e-8
        %¸ù½Úµã
        mincij_r=min(min(cij_r));
        [r0,t0]=find(cij_r==mincij_r);  %r0,t0Îª¾ØÕóÖÐÐÇ×´±ê¼ÇµÄÔªËØ
        r0=r0(1);
        t0=t0(1);
        set_r=zeros(1,M);  set_t=zeros(1,N);  %´æ·ÅÀ©Õ¹Ê÷ÖÐµÄ½Úµã£¬sr(i)=0±íÊ¾ÉÐÎ´±»À©Õ¹
        set_t(t0)=1;% color  st
        %spanning treeÖÐ¼ÇÂ¼¸¸½Úµã£¬¾ØÕóÖÐÓÉÎ´·ÖÅäÔªËØÖ¸ÏòÒÑ·ÖÅäÔªËØ
        r_pre=zeros(1,M);
        %À©Õ¹ËÑË÷Ê÷
        Q=tj_ri(t0);
        set_r(Q)=1; % color  sr
        r_pre(Q)=r0;
        %¿ÉÐÐ½âµÄswap loopÂ·¾¶
        Path=[];       
    end
    if cij_r(r0,t0)>=1e-8
       flag2=1;
    end
    count_BFS=count_BFS+1;
end
%¼ÆËãswap loopÖ®ºóµÄºÄÄÜcost
sum_cost_after=0;
for i=1:M
    sum_cost_after=sum_cost_after+cij(i,ri_tj(i));    %Î´swap loopÖ®Ç°µÄºÄÄÜcost
end
ri_tj1=ri_tj;
P_kill_BFS1=P_kill_BFS0;
end
