# Supplementary material for: Decentralized Algorithms for Weapon‐Target Assignment in Swarming Combat System
Source: Hindawi journal article supplement (doi:10.1155/2019/8425403), 2019-01-01
Supplement: f1 [file 8425403.f1.zip › 2 task swap algorithm/robot1.m]

%This function is embedded in Dijkstra
function [r2,state,flag_state,v_d1,v_pai1,visited1,count_r1,CL]=robot1(cij_r,ri_tj,r1,r0,v_d,v_pai,visited,state_before,count_r)
r2=r1;
state=state_before;
flag_state=0;
v_d1=v_d;
v_pai1=v_pai;
visited1=visited;
count_r1=count_r;
N=size(cij_r,1);
CL=zeros(1,N);
N=size(cij_r,1);
if r1==r0 
   if length(find(visited1))==1  
       for i=1:N  
           if cij_r(i,ri_tj(r1))>=0 
               if v_d1(i)>v_d1(r1)+cij_r(i,ri_tj(r1))
                   v_d1(i)=v_d1(r1)+cij_r(i,ri_tj(r1));
                   v_pai1(i)=r1;
                   state=0;
               end
           end
       end
   end
   
   CL=zeros(1,N);
   for i=1:N
       CL(i)=v_d1(i)+cij_r(r0,ri_tj(i));
   end
   if min(CL)<0
       flag_state=1;
       if length(find(visited1))==1
           count_r1=count_r1+1;
       end    
       Q=find(visited1==0);      
       if ~isempty(Q)
           r2=Q(1);
           for i=1:length(Q)
               if v_d1(r2)>v_d1(Q(i))
                   r2=Q(i);      
               end
           end
           if v_d1(r2)~=Inf
               visited1(r2)=1;
           else
               state=1;
           end
       else
           state=1;  
       end
       
   else
       Q=find(visited1==0);      
       if ~isempty(Q)
           r2=Q(1);
           for i=1:length(Q)
               if v_d1(r2)>v_d1(Q(i))
                   r2=Q(i);      
               end
           end
           if v_d1(r2)~=Inf
               visited1(r2)=1;
           else
               state=1;
           end
       else
           state=1;  
       end 
   end
end
if r1~=r0    
    for i=1:N  
        if cij_r(i,ri_tj(r1))>=0 
            if v_d1(i)>v_d1(r1)+cij_r(i,ri_tj(r1))
                v_d1(i)=v_d1(r1)+cij_r(i,ri_tj(r1));
                v_pai1(i)=r1;
                state=0;
            end
        end
    end
end
end
