# Supplementary material for: Decentralized Algorithms for Weapon‐Target Assignment in Swarming Combat System
Source: Hindawi journal article supplement (doi:10.1155/2019/8425403), 2019-01-01
Supplement: f1 [file 8425403.f1.zip › 3 hybrid algorithm/robot6.m]

function [r2,state,flag_state,v_d,v_pai,visited1,CL]=robot6(cij_r,ri_tj,neighbor,r1,r0,v_d_now,v_pai_now,v_d_pre,visited,state_before)
r2=r1;
state=state_before;
v_d=v_d_now;
v_pai=v_pai_now;
visited1=visited;
flag_state=0;
N=size(cij_r,1);
CL=zeros(1,N);
r2_temp=999;

if r1==r0    
    if length(find(visited1))==1  
       for i=1:N  
           if neighbor(r1,i)
             if v_d(i)>v_d(r1)+cij_r(i,ri_tj(r1))
                 v_d(i)=v_d(r1)+cij_r(i,ri_tj(r1));
                 v_pai(i)=r1;
                 state=0;
             end
           end
       end
    end
           for i=1:N
               CL(i)=v_d(i)+cij_r(r0,ri_tj(i));
           end
       S=find(visited1);
       for i=1:length(S)               
           if v_d(S(i))<v_d_pre(S(i)) && S(i)~=r0   
               if v_d(S(i))<r2_temp
                   r2=S(i);
                   r2_temp=v_d(S(i));
               end             
               state=3;
           end 
       end 
       if state~=3 
          if min(CL)<0
              flag_state=1; 
              Q=find(visited1==0);      
              if ~isempty(Q)
                  r2=Q(1);
                  for i=1:length(Q)
                      if v_d(r2)>v_d(Q(i))
                          r2=Q(i);      
                      end
                  end
                  if v_d(r2)~=Inf
                      visited1(r2)=1;
                  else
                      state=1;
                  end
              else
                  state=1;  
              end              
          else         
             Q=find(visited1==0);      
             if ~isempty(Q)
                 r2=Q(1);
                 for i=1:length(Q)
                     if v_d(r2)>v_d(Q(i))
                         r2=Q(i);     
                     end
                 end
                 if v_d(r2)~=Inf
                     visited1(r2)=1;
                 else
                     state=1;
                 end
             else
                 state=1; 
             end
          end
       end   
end
if r1~=r0    
    for i=1:N          
           if neighbor(r1,i)
             if v_d(i)>v_d(r1)+cij_r(i,ri_tj(r1))
                 v_d(i)=v_d(r1)+cij_r(i,ri_tj(r1));
                 v_pai(i)=r1;
                 state=0;
             end
           end        
    end
end
end
